# Supplementary material
Source: publisher figshare collection journal article supplement (https://gsapubs.figshare.com/ndownloader/files/29031063)
Supplement: Supplementary file 1 [file 29031063]

## Sheet: Sheet1
	Table S4. In situ Sr isotopic compositions of Cpx in the xenoliths
	Sample	Position	Rb	Sr	87Sr/86Sr	2σ
	Jingyu lherzolite
	17JY03	Rim	0.0148369	81.4973	0.704297	0.000439149
	17JY03	Mantle	0	86.454	0.703611	0.000386625
	17JY03	Core	0.0532197	62.4931	0.703301	0.000416672
	17JY18	Rim	0.00392154	128.188	0.703806	0.000239544
	17JY18	Mantle	0.0170768	127.577	0.703588	0.000257437
	17JY18	Core	0.0941957	130.153	0.703684	0.000225607
	17JY27	Rim	0.0417742	119.109	0.703506	0.000251202
	17JY27	Mantle	0	113.001	0.703252	0.000249321
	17JY27	Core	0.0463301	109.724	0.703395	0.000246852
	Jingyu harzburgite
	17JY06	Rim	0	213.043	0.704067	0.000126062
	17JY06	Mantle	0.062263	209.761	0.7039	0.000140575
	17JY06	Core	0	197.798	0.704079	0.000125181
	17JY21	Rim	0	79.4204	0.703609	0.000381267
	17JY21	Mantle	0.00943463	74.3291	0.704084	0.000325077
	17JY21	Core	0	86.3881	0.704558	0.000293519
	Kuandian lherzolite
	17KD15	Rim	0	185.796	0.702867	0.000161681
	17KD15	Mantle	0	178.626	0.703106	0.000164147
	17KD15	Core	0.023587	182.825	0.703242	0.000156557
	17KD19	Rim	0.049114	95.2155	0.702609	0.000277607
	17KD19	Mantle	0.00834138	96.3226	0.703331	0.000290541
	17KD19	Core	0.0412876	97.0087	0.70298	0.000287473
	Kuandian harzburgite
	17KD04	Rim	0.0405247	185.812	0.703137	0.000148028
	17KD04	Mantle	0.0276912	173.306	0.703066	0.000149565
	17KD04	Core	0.0208555	175.308	0.703165	0.000167675
	17KD25	Rim	0.0474115	126.424	0.703557	0.000206317
	17KD25	Core	0	125.33	0.703644	0.000213035
	Kuandian ol-websterite
	17KD12	Rim	0.0614238	77.6145	0.7022	0.000286045
	17KD12	Mantle	0	79.7327	0.702495	0.000343683
	17KD12	Core	0.0855171	80.5107	0.703204	0.000386354
